# Supplementary material
Source: publisher figshare collection journal article supplement (https://gsapubs.figshare.com/articles/dataset/_/22756583)
Supplement: Supplementary file 1 [file 1]

## Sheet: Count Data
Supplementary Table S3: Full apatite fission track count and length data (two worksheets)
Sample Number		151013A
Position (#)		11
Area of Graticule Square		6.4e-07
No. of Crystals		20
Zeta Factor ± Error		368.1	14.9
Rho d (% Relative Error)		1177000	1.62909
N d		3768
N s	N i	N g	Dpar	ρ s	ρ i	ρ s / ρ i	U ppm	Age (Ma)	Age error
4	32	100	2.41	62500	500000	0.125	6.37213	27.0216	14.3788
4	33	49	1.98	127551	1.0523e+06	0.121212	13.4107	26.2045	13.9206
6	29	36	2.35	260417	1.25868e+06	0.206897	16.041	44.6643	20.1264
2	9	21	2.35	148810	669643	0.222222	8.53411	47.9604	37.5508
4	29	100	2.31	62500	453125	0.137931	5.77475	29.8105	15.9531
3	19	40	2.1	117188	742188	0.157895	9.45863	34.1138	21.2458
2	18	60	2.43	52083.3	468750	0.111111	5.97387	24.0248	17.9377
7	40	70	2.07	156250	892857	0.175	11.3788	37.7987	15.5738
7	43	100	2.62	109375	671875	0.162791	8.56255	35.1687	14.4156
4	28	70	2.26	89285.7	625000	0.142857	7.96517	30.8726	16.557
4	20	50	2.18	125000	625000	0.2	7.96517	43.1804	23.7258
4	24	40	1.91	156250	937500	0.166667	11.9477	36.0037	19.5076
6	28	70	2.25	133929	625000	0.214286	7.96517	46.2537	20.9057
7	31	70	2.64	156250	691964	0.225806	8.81858	48.7311	20.5029
9	39	100	2.13	140625	609375	0.230769	7.76604	49.798	18.543
6	36	100	2.44	93750	562500	0.166667	7.16865	36.0037	15.9537
5	38	100	2.28	78125	593750	0.131579	7.56691	28.4407	13.5868
3	17	49	2.33	95663.3	542092	0.176471	6.90856	38.1154	23.9266
3	22	40	2.27	117188	859375	0.136364	10.9521	29.4725	18.1846
4	31	100	2.42	62500	484375	0.129032	6.173	27.8914	14.868
**********	**********	**********	**********	**********	**********	**********	**********	**********	**********
94	566	1365	2.2865	107601	647894	0.166078	8.25693	35.8769	4.29159
Pooled Ratio		0.166078	±	0.0198662
Mean Ratio		0.167028	±	0.00855203
Pooled Age		35.8769	±	4.29159	1 S.E.
Mean Crystal Age		36.0815	±	1.85233	1 S.E.
Central Age		35.8769	±	4.29159
Age Dispersion		1.21767e-09	%
Chi-squared		3.90759	with	19	degrees of freedom
P (Chi-Sq)		99.9911	%
MSWD		0.206606
Sample Number		151013C
Position (#)		12
Area of Graticule Square		6.4e-07
No. of Crystals		20
Zeta Factor ± Error		368.1	14.9
Rho d (% Relative Error)		1170000	1.63452
N d		3743
N s	N i	N g	Dpar	ρ s	ρ i	ρ s / ρ i	U ppm	Age (Ma)	Age error
7	37	100	2.19	109375	578125	0.189189	7.41186	40.6115	16.8325
5	26	60	2.48	130208	677083	0.192308	8.68056	41.2788	20.2379
6	29	100	2.38	93750	453125	0.206897	5.80929	44.3995	20.0072
4	26	100	2.08	62500	406250	0.153846	5.20833	33.0442	17.8061
5	27	60	2.19	130208	703125	0.185185	9.01442	39.7547	19.4328
6	35	100	2.39	93750	546875	0.171429	7.01122	36.8099	16.3439
8	47	80	2.59	156250	917969	0.170213	11.7688	36.5496	14.0695
6	34	100	2.31	93750	531250	0.176471	6.8109	37.8893	16.859
3	26	100	2.21	46875	406250	0.115385	5.20833	24.799	15.1599
3	27	64	1.86	73242.2	659180	0.111111	8.45102	23.8822	14.5716
7	35	100	2.27	109375	546875	0.2	7.01122	42.9245	17.8709
17	84	80	2.3	332031	1640625	0.202381	21.0337	43.4338	11.7057
5	35	100	2.35	78125	546875	0.142857	7.01122	30.6895	14.7334
8	38	100	2.47	125000	593750	0.210526	7.61218	45.1758	17.6834
4	28	100	2.38	62500	437500	0.142857	5.60897	30.6895	16.4588
4	25	80	2.13	78125	488281	0.16	6.26002	34.3624	18.5654
5	30	100	2.29	78125	468750	0.166667	6.00962	35.7902	17.3588
4	23	40	2.16	156250	898438	0.173913	11.5184	37.3418	20.295
6	32	50	2.29	187500	1000000	0.1875	12.8205	40.2501	17.9924
3	26	100	2.15	46875	406250	0.115385	5.20833	24.799	15.1599
**********	**********	**********	**********	**********	**********	**********	**********	**********	**********
116	670	1714	2.2735	105747	610779	0.173134	7.8305	37.1751	4.07553
Pooled Ratio		0.173134	±	0.0189808
Mean Ratio		0.168706	±	0.00681713
Pooled Age		37.1751	±	4.07553	1 S.E.
Mean Crystal Age		36.2269	±	1.46782	1 S.E.
Central Age		37.1751	±	4.07553
Age Dispersion		6.0391e-12	%
Chi-squared		2.83265	with	19	degrees of freedom
P (Chi-Sq)		>99.9	%
MSWD		0.174813
Sample Number		151013I
Position (#)		13
Area of Graticule Square		6.4e-07
No. of Crystals		20
Zeta Factor ± Error		368.1	14.9
Rho d (% Relative Error)		1162000	1.64001
N d		3718
N s	N i	N g	Dpar	ρ s	ρ i	ρ s / ρ i	U ppm	Age (Ma)	Age error
10	49	100	2.27	156250	765625	0.204082	9.88328	43.4991	15.2132
7	40	100	2.65	109375	625000	0.175	8.06799	37.3183	15.3761
9	59	60	2.41	234375	1.53646e+06	0.152542	19.8338	32.5414	11.7315
7	45	100	2.55	109375	703125	0.155556	9.07648	33.1825	13.5597
5	38	60	2.74	130208	989583	0.131579	12.7743	28.079	13.4141
5	20	40	2.91	195312	781250	0.25	10.085	53.246	26.7244
5	21	60	2.21	130208	546875	0.238095	7.05949	50.7204	25.3362
7	43	100	2.44	109375	671875	0.162791	8.67309	34.7217	14.2325
5	33	100	2.4	78125	515625	0.151515	6.65609	32.3228	15.5758
7	37	100	2.51	109375	578125	0.189189	7.46289	40.3347	16.7178
5	31	60	2.46	130208	807292	0.16129	10.4211	34.4026	16.6476
5	22	40	2.5	195312	859375	0.227273	11.0935	48.4236	24.0837
7	35	80	2.46	136719	683594	0.2	8.82436	42.6319	17.7492
5	29	50	2.54	156250	906250	0.172414	11.6986	36.7684	17.8768
7	33	80	2.55	136719	644531	0.212121	8.32011	45.2067	18.915
4	32	100	2.49	62500	500000	0.125	6.45439	26.678	14.196
2	22	50	2.57	62500	687500	0.0909091	8.87478	19.4131	14.3626
5	34	80	2.34	97656.2	664062	0.147059	8.57224	31.3744	15.0897
6	43	80	2.3	117188	839844	0.139535	10.8414	29.7729	13.0401
4	26	60	2.49	104167	677083	0.153846	8.74032	32.8188	17.6847
**********	**********	**********	**********	**********	**********	**********	**********	**********	**********
117	692	1500	2.4895	121875	720833	0.169075	9.30508	36.0584	3.93343
Pooled Ratio		0.169075	±	0.0184436
Mean Ratio		0.17199	±	0.00902155
Pooled Age		36.0584	±	3.93343	1 S.E.
Mean Crystal Age		36.6782	±	1.92912	1 S.E.
Central Age		36.0584	±	3.93343
Age Dispersion		7.45547e-11	%
Chi-squared		4.13899	with	19	degrees of freedom
P (Chi-Sq)		99.9862	%
MSWD		0.24243
Sample Number		151013J
Position (#)		14
Area of Graticule Square		6.4e-07
No. of Crystals		20
Zeta Factor ± Error		368.1	14.9
Rho d (% Relative Error)		1154000	1.64555
N d		3693
N s	N i	N g	Dpar	ρ s	ρ i	ρ s / ρ i	U ppm	Age (Ma)	Age error
4	33	100	2.53	62500	515625	0.121212	6.70223	25.6934	13.6493
4	21	30	2.45	208333	1093750	0.190476	14.2169	40.3295	22.072
4	26	35	2.38	178571	1.16071e+06	0.153846	15.0873	32.5934	17.5633
13	81	60	2.21	338542	2109375	0.160494	27.4182	33.9981	10.266
12	61	56	2.29	334821	1.70201e+06	0.196721	22.1232	41.6475	13.2774
6	30	100	2.55	93750	468750	0.2	6.09294	42.3394	19.0249
4	25	50	2.54	125000	781250	0.16	10.1549	33.8937	18.3123
9	61	28	2.29	502232	3.40402e+06	0.147541	44.2463	31.2609	11.2458
7	32	50	2.12	218750	1000000	0.21875	12.9983	46.2945	19.4225
9	51	28	2.24	502232	2.84598e+06	0.176471	36.9928	37.3727	13.6104
9	52	40	2.24	351562	2031250	0.173077	26.4027	36.656	13.3305
7	40	70	2.38	156250	892857	0.175	11.6056	37.0622	15.2706
26	112	50	2.17	812500	3500000	0.232143	45.4939	49.1181	10.9059
9	59	80	2.28	175781	1.15234e+06	0.152542	14.9785	32.3179	11.651
9	45	70	2.34	200893	1.00446e+06	0.2	13.0563	42.3394	15.5705
6	36	50	2.51	187500	1125000	0.166667	14.6231	35.3021	15.643
8	37	100	2.46	125000	578125	0.216216	7.51462	45.7602	17.9539
8	53	50	2.17	250000	1656250	0.150943	21.5284	31.98	12.2102
4	23	60	2.39	104167	598958	0.173913	7.78542	36.8326	20.0184
6	36	100	2.66	93750	562500	0.166667	7.31153	35.3021	15.643
**********	**********	**********	**********	**********	**********	**********	**********	**********	**********
164	914	1207	2.36	212303	1.1832e+06	0.179431	15.3796	37.9978	3.62494
Pooled Ratio		0.179431	±	0.0171175
Mean Ratio		0.176634	±	0.00618681
Pooled Age		37.9978	±	3.62494	1 S.E.
Mean Crystal Age		37.4072	±	1.31391	1 S.E.
Central Age		37.9978	±	3.62494
Age Dispersion		1.1879e-07	%
Chi-squared		3.72157	with	19	degrees of freedom
P (Chi-Sq)		99.9939	%
MSWD		0.186974
Sample Number		171013A
Position (#)		18
Area of Graticule Square		6.4e-07
No. of Crystals		20
Zeta Factor ± Error		368.1	14.9
Rho d (% Relative Error)		1123000	1.66806
N d		3594
N s	N i	N g	Dpar	ρ s	ρ i	ρ s / ρ i	U ppm	Age (Ma)	Age error
1	13	56	2.5	27901.8	362723	0.0769231	4.84492	15.8795	16.4936
3	33	30	2.39	156250	1718750	0.0909091	22.9575	18.7625	11.344
3	13	28	2.29	167411	725446	0.230769	9.68985	47.5217	30.5093
5	22	70	2.48	111607	491071	0.227273	6.55928	46.8043	23.2788
7	30	80	2.5	136719	585938	0.233333	7.82641	48.0477	20.2775
4	22	40	1.99	156250	859375	0.181818	11.4787	37.4706	20.4334
5	29	30	2.37	260417	1.51042e+06	0.172414	20.1748	35.5378	17.2788
4	24	50	2.5	125000	750000	0.166667	10.0178	34.3563	18.6154
4	19	28	2.66	223214	1.06027e+06	0.210526	14.1621	43.3671	23.9325
5	34	60	2.18	130208	885417	0.147059	11.8266	30.3239	14.5848
2	12	36	2.54	86805.6	520833	0.166667	6.95681	34.3563	26.2831
5	28	70	2.43	111607	625000	0.178571	8.34817	36.8033	17.9407
4	24	64	2.56	97656.2	585938	0.166667	7.82641	34.3563	18.6154
3	17	50	2.44	93750	531250	0.176471	7.09595	36.3716	22.8324
2	26	48	2.31	65104.2	846354	0.0769231	11.3048	15.8795	11.6731
3	23	70	2.28	66964.3	513393	0.130435	6.85743	26.9031	16.5564
6	28	50	2.1	187500	875000	0.214286	11.6874	44.1389	19.9505
4	28	36	1.97	173611	1.21528e+06	0.142857	16.2326	29.4595	15.7995
6	27	50	2.15	187500	843750	0.222222	11.27	45.7678	20.7536
5	27	50	2.51	156250	843750	0.185185	11.27	38.1624	18.6549
**********	**********	**********	**********	**********	**********	**********	**********	**********	**********
81	479	996	2.3575	127071	751443	0.169102	10.0371	34.857	4.45708
Pooled Ratio		0.169102	±	0.0216227
Mean Ratio		0.169899	±	0.0107911
Pooled Age		34.857	±	4.45708	1 S.E.
Mean Crystal Age		35.0208	±	2.23	1 S.E.
Central Age		34.857	±	4.45708
Age Dispersion		6.65895e-08	%
Chi-squared		5.34754	with	19	degrees of freedom
P (Chi-Sq)		99.9076	%
MSWD		0.423866
Sample Number		CAT13-29
Position (#)		3
Area of Graticule Square		6.4e-07
No. of Crystals		12
Zeta Factor ± Error		368.1	14.9
Rho d (% Relative Error)		1239000	1.5879
N d		3966
N s	N i	N g	Dpar	ρ s	ρ i	ρ s / ρ i	U ppm	Age (Ma)	Age error
4	62	30	1.88	208333	3.22917e+06	0.0645161	39.094	14.6954	7.60788
4	48	24	2.28	260417	3.125e+06	0.0833333	37.8329	18.9752	9.90942
2	45	25	1.87	125000	2812500	0.0444444	34.0496	10.1271	7.33155
12	169	60	2.31	312500	4.40104e+06	0.0710059	53.2814	16.1717	4.88218
4	44	18	2.01	347222	3.81944e+06	0.0909091	46.2402	20.6975	10.8463
5	71	40	2.21	195312	2.77344e+06	0.0704225	33.5767	16.039	7.45384
1	16	15	2.18	104167	1.66667e+06	0.0625	20.1776	14.2366	14.6878
4	45	35	2.72	178571	2.00893e+06	0.0888889	24.3212	20.2382	10.5959
7	88	50	2.12	218750	2750000	0.0795455	33.293	18.1139	7.15697
2	34	28	2.56	111607	1.89732e+06	0.0588235	22.97	13.4001	9.76737
26	330	35	2.18	1.16071e+06	1.47321e+07	0.0787879	178.355	17.9416	3.73697
14	186	25	2.16	875000	11625000	0.0752688	140.738	17.1413	4.80861
**********	**********	**********	**********	**********	**********	**********	**********	**********	**********
85	1138	385	2.20667	344968	4.61851e+06	0.0746924	55.9141	17.0102	2.05071
Pooled Ratio		0.0746924	±	0.00900472
Mean Ratio		0.0723705	±	0.00385921
Pooled Age		17.0102	±	2.05071	1 S.E.
Mean Crystal Age		16.4821	±	0.879986	1 S.E.
Central Age		17.0102	±	2.05071
Age Dispersion		4.03705e-17	%
Chi-squared		1.18462	with	11	degrees of freedom
P (Chi-Sq)		99.9882	%
MSWD		0.136395
Sample Number		191014C
Position (#)		34
Area of Graticule Square		6.4e-07
No. of Crystals		12
Zeta Factor ± Error		368.1	14.9
Rho d (% Relative Error)		1181000	1.62672
N d		3779
N s	N i	N g	Dpar	ρ s	ρ i	ρ s / ρ i	U ppm	Age (Ma)	Age error
5	65	40	1.86	195312	2.53906e+06	0.0769231	32.2489	16.6986	7.7839
0	1	36	-	0	43402.8	0	0.551263	0	0
0	1	30	-	0	52083.3	0	0.661516	0	0
0	2	50	-	0	62500	0	0.793819	0	0
0	1	50	-	0	31250	0	0.396909	0	0
1	5	24	1.83	65104.2	325521	0.2	4.13447	43.3267	47.4996
5	31	28	2.06	279018	1.72991e+06	0.16129	21.9718	34.9636	16.9189
1	15	28	2.02	55803.6	837054	0.0666667	10.6315	14.4746	14.9626
1	9	50	2.16	31250	281250	0.111111	3.57218	24.1063	25.432
3	46	30	1.81	156250	2.39583e+06	0.0652174	30.4297	14.1603	8.46041
1	14	18	2.45	86805.6	1.21528e+06	0.0714286	15.4354	15.5073	16.0658
2	27	25	2.05	125000	1687500	0.0740741	21.4331	16.0809	11.8054
**********	**********	**********	**********	**********	**********	**********	**********	**********	**********
19	217	409	2.03	72585.6	829004	0.0875576	10.5293	19.0037	4.62158
Pooled Ratio		0.0875576	±	0.0212934
Mean Ratio		0.0688926	±	0.0187911
Pooled Age		19.0037	±	4.62158	1 S.E.
Mean Crystal Age		14.9573	±	4.0832	1 S.E.
Central Age		19.0037	±	4.62158
Age Dispersion		3.28812e-06	%
Chi-squared		3.23348	with	11	degrees of freedom
P (Chi-Sq)		98.7266	%
MSWD		0.293952
Sample Number		191014D
Position (#)		35
Area of Graticule Square		6.4e-07
No. of Crystals		20
Zeta Factor ± Error		368.1	14.9
Rho d (% Relative Error)		1172000	1.63321
N d		3749
N s	N i	N g	Dpar	ρ s	ρ i	ρ s / ρ i	U ppm	Age (Ma)	Age error
12	124	80	1.89	234375	2421875	0.0967742	30.9967	20.8411	6.36603
3	24	25	1.62	187500	1500000	0.125	19.198	26.9071	16.519
3	36	28	1.76	167411	2.00893e+06	0.0833333	25.7115	17.9505	10.8153
6	96	48	1.66	195312	3.125e+06	0.0625	39.9957	13.4676	5.69774
1	11	21	1.62	74404.8	818452	0.0909091	10.4751	19.5799	20.4684
1	12	20	1.87	78125	937500	0.0833333	11.9987	17.9505	18.6999
12	151	100	1.53	187500	2359375	0.0794702	30.1968	17.1195	5.18868
6	80	48	1.76	195312	2.60417e+06	0.075	33.3298	16.1577	6.87552
2	22	18	1.54	173611	1.90972e+06	0.0909091	24.4418	19.5799	14.486
5	62	70	1.54	111607	1.38393e+06	0.0806452	17.7124	17.3723	8.11183
2	33	30	1.65	104167	1718750	0.0606061	21.9977	13.0599	9.52753
5	48	20	1.68	390625	3750000	0.104167	47.9949	22.4304	10.5861
0	19	25	-	0	1187500	0	15.1984	0	0
3	55	36	1.48	130208	2.38715e+06	0.0545455	30.5523	11.7551	6.9883
7	79	35	1.57	312500	3.52679e+06	0.0886076	45.138	19.085	7.5722
6	103	50	1.55	187500	3218750	0.0582524	41.1956	12.5532	5.30038
1	20	18	1.64	86805.6	1.73611e+06	0.05	22.2199	10.7763	11.0525
2	17	24	1.66	130208	1.10677e+06	0.117647	14.1652	25.3274	18.9656
4	56	25	1.62	250000	3500000	0.0714286	44.7952	15.3892	7.99296
9	124	80	1.57	175781	2421875	0.0725806	30.9967	15.6371	5.44121
**********	**********	**********	**********	**********	**********	**********	**********	**********	**********
90	1172	801	1.64263	175562	2.2862e+06	0.0767918	29.2603	16.5433	1.94828
Pooled Ratio		0.0767918	±	0.00904371
Mean Ratio		0.0772854	±	0.0060158
Pooled Age		16.5433	±	1.94828	1 S.E.
Mean Crystal Age		16.6495	±	1.29752	1 S.E.
Central Age		16.5433	±	1.94828
Age Dispersion		1.61006e-09	%
Chi-squared		5.05235	with	19	degrees of freedom
P (Chi-Sq)		99.9386	%
MSWD		0.179767
Sample Number		191014G
Position (#)		36
Area of Graticule Square		6.4e-07
No. of Crystals		20
Zeta Factor ± Error		368.1	14.9
Rho d (% Relative Error)		1162000	1.63979
N d		3719
N s	N i	N g	Dpar	ρ s	ρ i	ρ s / ρ i	U ppm	Age (Ma)	Age error
3	45	36	1.63	130208	1953125	0.0666667	25.2125	14.242	8.51503
8	104	30	1.96	416667	5.41667e+06	0.0769231	69.9225	16.4303	6.07082
6	57	100	1.73	93750	890625	0.105263	11.4969	22.473	9.69516
3	44	50	1.54	93750	1375000	0.0681818	17.7496	14.5653	8.71449
4	70	100	1.68	62500	1093750	0.0571429	14.119	12.2094	6.29928
1	29	28	1.86	55803.6	1.6183e+06	0.0344828	20.8903	7.37048	7.50339
0	13	30	-	0	677083	0	8.74032	0	0
5	67	50	1.61	156250	2093750	0.0746269	27.0278	15.9404	7.42271
4	36	36	1.66	173611	1562500	0.111111	20.17	23.7192	12.544
4	51	40	1.57	156250	1.99219e+06	0.0784314	25.7167	16.752	8.729
3	37	48	1.43	97656.2	1.20443e+06	0.0810811	15.5477	17.3172	10.423
4	37	24	1.54	260417	2.40885e+06	0.108108	31.0954	23.0793	12.1892
7	89	100	1.86	109375	1390625	0.0786517	17.9513	16.799	6.63509
1	14	24	2.26	65104.2	911458	0.0714286	11.7658	15.2581	15.8077
2	32	60	1.62	52083.3	833333	0.0625	10.7573	13.3528	9.74989
2	24	49	1.62	63775.5	765306	0.0833333	9.87917	17.7976	13.1217
2	25	20	1.4	156250	1953125	0.08	25.2125	17.0866	12.5782
11	150	70	1.6	245536	3.34821e+06	0.0733333	43.2214	15.6645	4.94072
2	44	70	1.6	44642.9	982143	0.0454545	12.6783	9.71386	7.03591
8	102	50	1.72	250000	3187500	0.0784314	41.1467	16.752	6.19398
**********	**********	**********	**********	**********	**********	**********	**********	**********	**********
80	1070	1015	1.67842	123153	1.64717e+06	0.0747664	21.2629	15.9702	1.97811
Pooled Ratio		0.0747664	±	0.00926076
Mean Ratio		0.0717576	±	0.00562515
Pooled Age		15.9702	±	1.97811	1 S.E.
Mean Crystal Age		15.3283	±	1.20292	1 S.E.
Central Age		15.9702	±	1.97811
Age Dispersion		4.71732e-12	%
Chi-squared		4.2735	with	19	degrees of freedom
P (Chi-Sq)		99.9823	%
MSWD		0.196364
Sample Number		131013A
Position (#)		31
Area of Graticule Square		6.4e-07
No. of Crystals		30
Zeta Factor ± Error		368.1	14.9
Rho d (% Relative Error)		1022000	1.74848
N d		3271
N s	N i	N g	Dpar	ρ s	ρ i	ρ s / ρ i	U ppm	Age (Ma)	Age error
0	2	20	-	0	156250	0	2.2933	0	0
0	3	49	-	0	95663.3	0	1.40406	0	0
0	2	49	-	0	63775.5	0	0.93604	0	0
0	2	40	-	0	78125	0	1.14665	0	0
0	5	60	-	0	130208	0	1.91108	0	0
0	5	100	-	0	78125	0	1.14665	0	0
0	4	60	-	0	104167	0	1.52886	0	0
0	4	50	-	0	125000	0	1.83464	0	0
0	4	50	-	0	125000	0	1.83464	0	0
0	2	49	-	0	63775.5	0	0.93604	0	0
0	4	70	-	0	89285.7	0	1.31046	0	0
0	3	64	-	0	73242.2	0	1.07498	0	0
6	40	35	2.06	267857	1.78571e+06	0.15	26.2091	28.1533	12.3878
0	4	50	-	0	125000	0	1.83464	0	0
1	4	42	2.34	37202.4	148810	0.25	2.18409	46.8541	52.4252
0	3	50	-	0	93750	0	1.37598	0	0
0	6	100	-	0	93750	0	1.37598	0	0
0	3	50	-	0	93750	0	1.37598	0	0
0	2	36	-	0	86805.6	0	1.27405	0	0
0	2	30	-	0	104167	0	1.52886	0	0
0	1	36	-	0	43402.8	0	0.637027	0	0
2	15	100	1.83	31250	234375	0.133333	3.43995	25.0312	18.8751
1	3	40	1.86	39062.5	117188	0.333333	1.71997	62.3967	72.1021
2	13	60	2.23	52083.3	338542	0.153846	4.96881	28.8736	21.968
0	2	25	-	0	125000	0	1.83464	0	0
0	8	28	-	0	446429	0	6.55228	0	0
0	3	25	-	0	187500	0	2.75196	0	0
0	1	30	-	0	52083.3	0	0.764432	0	0
0	2	49	-	0	63775.5	0	0.93604	0	0
0	1	50	-	0	31250	0	0.458659	0	0
**********	**********	**********	**********	**********	**********	**********	**********	**********	**********
12	153	1497	2.064	12525.1	159694	0.0784314	2.34385	14.736	4.46512
Pooled Ratio		0.0784314	±	0.0237653
Mean Ratio		0.0340171	±	0.0152693
Pooled Age		14.736	±	4.46512	1 S.E.
Mean Crystal Age		6.39541	±	2.87151	1 S.E.
Central Age		14.6212	±	4.46899
Age Dispersion		9.8795	%
Chi-squared		12.7798	with	29	degrees of freedom
P (Chi-Sq)		99.6021	%
MSWD		0.440682
Sample Number		131013E
Position (#)		32
Area of Graticule Square		6.4e-07
No. of Crystals		31
Zeta Factor ± Error		368.1	14.9
Rho d (% Relative Error)		1014000	1.7552
N d		3246
N s	N i	N g	Dpar	ρ s	ρ i	ρ s / ρ i	U ppm	Age (Ma)	Age error
0	10	100	-	0	156250	0	2.31139	0	0
1	10	60	-	26041.7	260417	0.1	3.85232	18.6357	19.5626
0	5	50	-	0	156250	0	2.31139	0	0
1	18	80	-	19531.2	351562	0.0555556	5.20063	10.3598	10.6535
0	6	50	-	0	187500	0	2.77367	0	0
6	80	50	1.97	187500	2500000	0.075	36.9822	13.9818	5.9503
0	6	60	-	0	156250	0	2.31139	0	0
2	21	100	1.88	31250	328125	0.0952381	4.85392	17.7495	13.1582
1	6	64	2.18	24414.1	146484	0.166667	2.16693	31.0296	33.5438
1	28	70	1.61	22321.4	625000	0.0357143	9.24556	6.6618	6.78608
0	8	70	-	0	178571	0	2.64159	0	0
1	7	50	2.22	31250	218750	0.142857	3.23595	26.606	28.4672
0	15	50	-	0	468750	0	6.93417	0	0
0	5	50	-	0	156250	0	2.31139	0	0
0	5	50	-	0	156250	0	2.31139	0	0
2	21	70	1.99	44642.9	468750	0.0952381	6.93417	17.7495	13.1582
0	13	100	-	0	203125	0	3.00481	0	0
1	9	50	-	31250	281250	0.111111	4.1605	20.703	21.842
0	3	49	-	0	95663.3	0	1.41514	0	0
3	54	100	1.73	46875	843750	0.0555556	12.4815	10.3598	6.16212
0	4	100	-	0	62500	0	0.924556	0	0
0	3	50	-	0	93750	0	1.38683	0	0
1	12	100	1.86	15625	187500	0.0833333	2.77367	15.5335	16.1823
0	2	50	-	0	62500	0	0.924556	0	0
0	5	49	-	0	159439	0	2.35856	0	0
2	25	50	1.61	62500	781250	0.08	11.557	14.9129	10.9784
2	28	64	1.62	48828.1	683594	0.0714286	10.1123	13.3167	9.76453
0	6	50	-	0	187500	0	2.77367	0	0
0	8	50	-	0	250000	0	3.69822	0	0
0	4	100	-	0	62500	0	0.924556	0	0
8	103	100	1.58	125000	1609375	0.0776699	23.8073	14.479	5.35244
**********	**********	**********	**********	**********	**********	**********	**********	**********	**********
32	530	2086	1.84091	23969.3	396992	0.0603774	5.87266	11.2582	2.10872
Pooled Ratio		0.0603774	±	0.011309
Mean Ratio		0.0401732	±	0.00905148
Pooled Age		11.2582	±	2.10872	1 S.E.
Mean Crystal Age		7.49303	±	1.68903	1 S.E.
Central Age		11.2582	±	2.10872
Age Dispersion		5.96851e-07	%
Chi-squared		10.8594	with	30	degrees of freedom
P (Chi-Sq)		99.9474	%
MSWD		0.361981
Sample Number		131013F
Position (#)		33
Area of Graticule Square		6.4e-07
No. of Crystals		32
Zeta Factor ± Error		368.1	14.9
Rho d (% Relative Error)		1007000	1.76199
N d		3221
N s	N i	N g	Dpar	ρ s	ρ i	ρ s / ρ i	U ppm	Age (Ma)	Age error
0	5	24	-	0	325521	0	4.84887	0	0
0	10	70	-	0	223214	0	3.32494	0	0
0	11	40	-	0	429688	0	6.40051	0	0
0	28	36	-	0	1.21528e+06	0	18.1024	0	0
2	16	50	1.82	62500	500000	0.125	7.44786	23.1258	17.3743
0	6	100	-	0	93750	0	1.39647	0	0
1	8	50	2.01	31250	250000	0.125	3.72393	23.1258	24.5498
0	7	60	-	0	182292	0	2.71537	0	0
4	52	50	2.05	125000	1625000	0.0769231	24.2056	14.2411	7.41602
0	3	30	-	0	156250	0	2.32746	0	0
2	35	50	2.09	62500	1093750	0.0571429	16.2922	10.5821	7.70765
0	5	56	-	0	139509	0	2.07809	0	0
3	19	70	1.91	66964.3	424107	0.157895	6.31739	29.1977	18.1851
3	100	60	1.98	78125	2.60417e+06	0.03	38.791	5.55775	3.26578
1	8	50	2.17	31250	250000	0.125	3.72393	23.1258	24.5498
0	10	50	-	0	312500	0	4.65492	0	0
0	3	49	-	0	95663.3	0	1.42497	0	0
1	13	100	2.16	15625	203125	0.0769231	3.0257	14.2411	14.792
4	41	100	1.96	62500	640625	0.097561	9.54258	18.0565	9.49192
1	13	70	2.09	22321.4	290179	0.0769231	4.32242	14.2411	14.792
2	9	60	2.22	52083.3	234375	0.222222	3.49119	41.0553	32.1455
2	31	50	2.17	62500	968750	0.0645161	14.4302	11.9462	8.73144
0	8	60	-	0	208333	0	3.10328	0	0
1	9	100	1.93	15625	140625	0.111111	2.09471	20.5603	21.6915
0	3	100	-	0	46875	0	0.698237	0	0
3	17	70	2.03	66964.3	379464	0.176471	5.6524	32.6241	20.4807
1	25	100	2.47	15625	390625	0.04	5.81864	7.40927	7.56308
0	3	60	-	0	78125	0	1.16373	0	0
1	15	50	2	31250	468750	0.0666667	6.98237	12.3441	12.7605
5	72	64	2	122070	1.75781e+06	0.0694444	26.1839	12.8579	5.97356
2	14	42	2.15	74404.8	520833	0.142857	7.75819	26.4227	20.0077
4	45	70	1.89	89285.7	1.00446e+06	0.0888889	14.9622	16.4535	8.61528
**********	**********	**********	**********	**********	**********	**********	**********	**********	**********
43	644	1991	2.05789	33745.6	505399	0.0667702	7.52829	12.3632	2.02234
Pooled Ratio		0.0667702	±	0.0109221
Mean Ratio		0.0603295	±	0.0111343
Pooled Age		12.3632	±	2.02234	1 S.E.
Mean Crystal Age		11.1717	±	2.06328	1 S.E.
Central Age		12.3632	±	2.02235
Age Dispersion		0.148052	%
Chi-squared		20.0901	with	31	degrees of freedom
P (Chi-Sq)		93.3853	%
MSWD		0.648068
Sample Number		131013I
Position (#)		34
Area of Graticule Square		6.4e-07
No. of Crystals		27
Zeta Factor ± Error		368.1	14.9
Rho d (% Relative Error)		998700	1.76887
N d		3196
N s	N i	N g	Dpar	ρ s	ρ i	ρ s / ρ i	U ppm	Age (Ma)	Age error
0	5	60	-	0	130208	0	1.95567	0	0
1	5	70	1.76	22321.4	111607	0.2	1.67629	36.6577	40.1892
1	4	50	1.72	31250	125000	0.25	1.87744	45.7897	51.2344
0	4	60	-	0	104167	0	1.56453	0	0
0	6	50	-	0	187500	0	2.81616	0	0
0	4	50	-	0	125000	0	1.87744	0	0
0	6	60	-	0	156250	0	2.3468	0	0
0	2	50	-	0	62500	0	0.93872	0	0
0	8	80	-	0	156250	0	2.3468	0	0
0	10	100	-	0	156250	0	2.3468	0	0
0	2	60	-	0	52083.3	0	0.782267	0	0
0	3	60	-	0	78125	0	1.1734	0	0
0	3	64	-	0	73242.2	0	1.10006	0	0
2	5	60	1.84	52083.3	130208	0.4	1.95567	73.1082	61.2519
0	6	64	-	0	146484	0	2.20013	0	0
0	2	40	-	0	78125	0	1.1734	0	0
2	26	100	1.76	31250	406250	0.0769231	6.10168	14.1238	10.3828
1	6	50	1.93	31250	187500	0.166667	2.81616	30.5626	33.0389
0	6	100	-	0	93750	0	1.40808	0	0
0	5	100	-	0	78125	0	1.1734	0	0
1	10	60	1.5	26041.7	260417	0.1	3.91133	18.3549	19.2679
0	3	50	-	0	93750	0	1.40808	0	0
3	15	60	1.75	78125	390625	0.2	5.867	36.6577	23.2409
1	6	56	1.52	27901.8	167411	0.166667	2.51443	30.5626	33.0389
0	8	60	-	0	208333	0	3.12907	0	0
0	2	100	-	0	31250	0	0.46936	0	0
0	5	70	-	0	111607	0	1.67629	0	0
**********	**********	**********	**********	**********	**********	**********	**********	**********	**********
12	167	1784	1.7225	10510.1	146265	0.0718563	2.19684	13.1944	3.98622
Pooled Ratio		0.0718563	±	0.0217088
Mean Ratio		0.0577873	±	0.0201069
Pooled Age		13.1944	±	3.98622	1 S.E.
Mean Crystal Age		10.6132	±	3.6948	1 S.E.
Central Age		13.1942	±	3.98632
Age Dispersion		0.983479	%
Chi-squared		18.4365	with	26	degrees of freedom
P (Chi-Sq)		85.9321	%
MSWD		0.709095
Sample Number		131013N
Position (#)		35
Area of Graticule Square		6.4e-07
No. of Crystals		23
Zeta Factor ± Error		368.1	14.9
Rho d (% Relative Error)		991000	1.77583
N d		3171
N s	N i	N g	Dpar	ρ s	ρ i	ρ s / ρ i	U ppm	Age (Ma)	Age error
0	2	60	-	0	52083.3	0	0.788345	0	0
0	6	40	-	0	234375	0	3.54755	0	0
0	3	100	-	0	46875	0	0.709511	0	0
0	5	49	-	0	159439	0	2.4133	0	0
1	3	60	2.18	26041.7	78125	0.333333	1.18252	60.5129	69.9255
0	5	70	-	0	111607	0	1.68931	0	0
2	5	50	1.75	62500	156250	0.4	2.36504	72.5477	60.7824
0	2	40	-	0	78125	0	1.18252	0	0
0	2	40	-	0	78125	0	1.18252	0	0
0	2	40	-	0	78125	0	1.18252	0	0
0	1	50	-	0	31250	0	0.473007	0	0
0	2	60	-	0	52083.3	0	0.788345	0	0
0	4	60	-	0	104167	0	1.57669	0	0
0	1	40	-	0	39062.5	0	0.591259	0	0
1	8	100	1.64	15625	125000	0.125	1.89203	22.759	24.1605
0	4	40	-	0	156250	0	2.36504	0	0
0	2	35	-	0	89285.7	0	1.35145	0	0
0	3	80	-	0	58593.8	0	0.886888	0	0
1	2	40	2.24	39062.5	78125	0.5	1.18252	90.5577	110.982
0	1	50	-	0	31250	0	0.473007	0	0
0	3	100	-	0	46875	0	0.709511	0	0
0	3	64	-	0	73242.2	0	1.10861	0	0
2	10	100	1.71	31250	156250	0.2	2.36504	36.3759	28.2225
**********	**********	**********	**********	**********	**********	**********	**********	**********	**********
7	79	1368	1.904	7995.25	90232.1	0.0886076	1.36577	16.1412	6.40523
Pooled Ratio		0.0886076	±	0.0351616
Mean Ratio		0.0677536	±	0.0305145
Pooled Age		16.1412	±	6.40523	1 S.E.
Mean Crystal Age		12.346	±	5.56324	1 S.E.
Central Age		16.1409	±	6.40527
Age Dispersion		1.04056	%
Chi-squared		13.768	with	22	degrees of freedom
P (Chi-Sq)		90.9507	%
MSWD		0.62582
Sample Number		131013S
Position (#)		36
Area of Graticule Square		6.4e-07
No. of Crystals		20
Zeta Factor ± Error		368.1	14.9
Rho d (% Relative Error)		983200	1.78287
N d		3146
N s	N i	N g	Dpar	ρ s	ρ i	ρ s / ρ i	U ppm	Age (Ma)	Age error
3	25	48	2.27	97656.2	813802	0.12	12.4156	21.6785	13.2804
15	190	56	2.16	418527	5.30134e+06	0.0789474	80.8789	14.2703	3.87897
3	20	30	2.26	156250	1.04167e+06	0.15	15.892	27.0867	16.8132
1	8	20	1.97	78125	625000	0.125	9.53519	22.5802	23.9707
2	22	40	2.29	78125	859375	0.0909091	13.1109	16.4298	12.1559
0	17	24	-	0	1.10677e+06	0	16.8852	0	0
2	32	40	2.32	78125	1250000	0.0625	19.0704	11.3	8.25134
2	26	42	2.1	74404.8	967262	0.0769231	14.7568	13.9048	10.2219
0	10	40	-	0	390625	0	5.95949	0	0
0	12	50	-	0	375000	0	5.72111	0	0
2	20	50	1.73	62500	625000	0.1	9.53519	18.0704	13.4252
2	12	50	1.88	62500	375000	0.166667	5.72111	30.0893	23.0196
0	13	36	-	0	564236	0	8.60816	0	0
3	29	40	2.16	117188	1.13281e+06	0.103448	17.2825	18.6927	11.3668
3	34	35	2.21	133929	1.51786e+06	0.0882353	23.1569	15.9471	9.63056
1	30	35	2.39	44642.9	1.33929e+06	0.0333333	20.4326	6.02911	6.13457
4	28	36	2.05	173611	1.21528e+06	0.142857	18.5406	25.7994	13.8375
4	32	60	2.1	104167	833333	0.125	12.7136	22.5802	12.0165
2	19	70	2.27	44642.9	424107	0.105263	6.47031	19.0201	14.1644
3	32	49	2.31	95663.3	1.02041e+06	0.09375	15.5677	16.9425	10.2574
**********	**********	**********	**********	**********	**********	**********	**********	**********	**********
52	611	851	2.15438	95475.9	1.12184e+06	0.0851064	17.1152	15.3823	2.32389
Pooled Ratio		0.0851064	±	0.0128575
Mean Ratio		0.0831417	±	0.0116837
Pooled Age		15.3823	±	2.32389	1 S.E.
Mean Crystal Age		15.0276	±	2.11391	1 S.E.
Central Age		15.3823	±	2.32389
Age Dispersion		4.6341e-07	%
Chi-squared		9.49769	with	19	degrees of freedom
P (Chi-Sq)		96.4269	%
MSWD		0.499878
Sample Number		131013T
Position (#)		37
Area of Graticule Square		6.4e-07
No. of Crystals		20
Zeta Factor ± Error		368.1	14.9
Rho d (% Relative Error)		975400	1.79
N d		3121
N s	N i	N g	Dpar	ρ s	ρ i	ρ s / ρ i	U ppm	Age (Ma)	Age error
6	69	36	2.12	260417	2.99479e+06	0.0869565	46.0548	15.5918	6.67208
7	95	60	2.12	182292	2.47396e+06	0.0736842	38.0453	13.2144	5.20826
0	18	20	-	0	1406250	0	21.6257	0	0
3	56	42	2.08	111607	2.08333e+06	0.0535714	32.0381	9.6101	5.71094
5	90	60	2.1	130208	2343750	0.0555556	36.0429	9.96576	4.60014
5	89	100	2.23	78125	1390625	0.0561798	21.3855	10.0776	4.65315
7	105	50	2.19	218750	3281250	0.0666667	50.4601	11.9571	4.69746
2	40	30	2.1	104167	2.08333e+06	0.05	32.0381	8.96988	6.51141
4	43	30	2.03	208333	2.23958e+06	0.0930233	34.441	16.6782	8.74952
2	43	30	2.08	104167	2.23958e+06	0.0465116	34.441	8.34447	6.04738
4	74	40	2.19	156250	2890625	0.0540541	44.4529	9.69662	4.99609
10	93	60	2.12	260417	2421875	0.107527	37.2443	19.2746	6.47099
3	46	30	2.05	156250	2.39583e+06	0.0652174	36.8439	11.6974	6.98942
7	78	50	1.9	218750	2437500	0.0897436	37.4846	16.0909	6.38864
6	79	60	1.77	156250	2.05729e+06	0.0759494	31.6377	13.6202	5.79914
4	73	60	2.1	104167	1.90104e+06	0.0547945	29.2348	9.82934	5.06624
1	54	60	2.02	26041.7	1406250	0.0185185	21.6257	3.32363	3.35749
5	40	18	2.13	434028	3.47222e+06	0.125	53.3969	22.4013	10.672
3	41	25	2.15	187500	2562500	0.0731707	39.4069	13.1224	7.86998
3	54	36	2	130208	2343750	0.0555556	36.0429	9.96576	5.92783
**********	**********	**********	**********	**********	**********	**********	**********	**********	**********
87	1280	897	2.07789	151547	2.22965e+06	0.0679687	34.2883	12.1904	1.45441
Pooled Ratio		0.0679687	±	0.00810921
Mean Ratio		0.065084	±	0.00630706
Pooled Age		12.1904	±	1.45441	1 S.E.
Mean Crystal Age		11.6735	±	1.13216	1 S.E.
Central Age		12.1904	±	1.45441
Age Dispersion		5.84862e-05	%
Chi-squared		9.57846	with	19	degrees of freedom
P (Chi-Sq)		96.259	%
MSWD		0.50413
Sample Number		131013U
Position (#)		38
Area of Graticule Square		6.4e-07
No. of Crystals		22
Zeta Factor ± Error		368.1	14.9
Rho d (% Relative Error)		967700	1.79692
N d		3097
N s	N i	N g	Dpar	ρ s	ρ i	ρ s / ρ i	U ppm	Age (Ma)	Age error
2	10	50	2.24	62500	312500	0.2	4.84396	35.523	27.5609
7	86	50	2.06	218750	2687500	0.0813953	41.6581	14.4807	5.72758
0	3	70	-	0	66964.3	0	1.03799	0	0
4	28	100	1.91	62500	437500	0.142857	6.78154	25.3935	13.6199
7	56	100	2.01	109375	875000	0.125	13.5631	22.2248	8.96394
4	49	70	1.85	89285.7	1093750	0.0816327	16.9539	14.5228	7.57932
1	8	40	1.98	39062.5	312500	0.125	4.84396	22.2248	23.5935
2	28	28	1.91	111607	1562500	0.0714286	24.2198	12.7093	9.31924
0	2	36	-	0	86805.6	0	1.34554	0	0
3	37	50	1.89	93750	1156250	0.0810811	17.9227	14.4248	8.68275
2	17	50	1.84	62500	531250	0.117647	8.23473	20.9196	15.6657
3	29	70	2.35	66964.3	647321	0.103448	10.0339	18.3984	11.1879
2	46	50	2.26	62500	1437500	0.0434783	22.2822	7.73906	5.60053
8	115	49	1.98	255102	3.66709e+06	0.0695652	56.8424	12.378	4.55903
0	6	70	-	0	133929	0	2.07598	0	0
1	19	60	1.96	26041.7	494792	0.0526316	7.6696	9.36715	9.61944
0	3	36	-	0	130208	0	2.01832	0	0
3	30	40	1.94	117188	1171875	0.1	18.1648	17.786	10.7987
3	29	48	2.1	97656.2	944010	0.103448	14.6328	18.3984	11.1879
2	24	36	1.97	86805.6	1.04167e+06	0.0833333	16.1465	14.825	10.9307
1	11	60	1.95	26041.7	286458	0.0909091	4.4403	16.1711	16.9053
7	81	24	1.86	455729	5.27344e+06	0.0864198	81.7418	15.3735	6.09465
**********	**********	**********	**********	**********	**********	**********	**********	**********	**********
62	717	1187	2.00333	81613.3	943818	0.0864714	14.6298	15.3826	2.14725
Pooled Ratio		0.0864714	±	0.0120705
Mean Ratio		0.0799671	±	0.010747
Pooled Age		15.3826	±	2.14725	1 S.E.
Mean Crystal Age		14.2268	±	1.91382	1 S.E.
Central Age		15.3826	±	2.14725
Age Dispersion		5.29478e-08	%
Chi-squared		6.39143	with	21	degrees of freedom
P (Chi-Sq)		99.9064	%
MSWD		0.304354
Sample Number		131013V
Position (#)		39
Area of Graticule Square		6.4e-07
No. of Crystals		30
Zeta Factor ± Error		368.1	14.9
Rho d (% Relative Error)		959900	1.80422
N d		3072
N s	N i	N g	Dpar	ρ s	ρ i	ρ s / ρ i	U ppm	Age (Ma)	Age error
0	2	60	-	0	52083.3	0	0.813887	0	0
1	5	100	1.98	15625	78125	0.2	1.22083	35.2374	38.6323
0	5	50	-	0	156250	0	2.44166	0	0
0	2	100	-	0	31250	0	0.488332	0	0
0	2	40	-	0	78125	0	1.22083	0	0
0	1	60	-	0	26041.7	0	0.406943	0	0
6	52	70	2.13	133929	1.16071e+06	0.115385	18.1381	20.3528	8.82151
0	1	60	-	0	26041.7	0	0.406943	0	0
0	2	30	-	0	104167	0	1.62777	0	0
0	1	40	-	0	39062.5	0	0.610415	0	0
0	1	60	-	0	26041.7	0	0.406943	0	0
1	3	60	1.93	26041.7	78125	0.333333	1.22083	58.6225	67.7413
0	2	70	-	0	44642.9	0	0.697617	0	0
0	1	80	-	0	19531.2	0	0.305208	0	0
0	5	100	-	0	78125	0	1.22083	0	0
0	2	60	-	0	52083.3	0	0.813887	0	0
0	3	60	-	0	78125	0	1.22083	0	0
1	3	60	1.89	26041.7	78125	0.333333	1.22083	58.6225	67.7413
0	1	30	-	0	52083.3	0	0.813887	0	0
0	1	60	-	0	26041.7	0	0.406943	0	0
0	1	50	-	0	31250	0	0.488332	0	0
0	1	60	-	0	26041.7	0	0.406943	0	0
0	2	50	-	0	62500	0	0.976664	0	0
2	24	50	2.11	62500	750000	0.0833333	11.72	14.7057	10.8427
2	21	100	1.99	31250	328125	0.0952381	5.12749	16.8038	12.4573
0	2	42	-	0	74404.8	0	1.1627	0	0
0	1	50	-	0	31250	0	0.488332	0	0
0	3	100	-	0	46875	0	0.732498	0	0
3	31	40	1.93	117188	1.21094e+06	0.0967742	18.9229	17.0744	10.3516
2	24	50	2.01	62500	750000	0.0833333	11.72	14.7057	10.8427
**********	**********	**********	**********	**********	**********	**********	**********	**********	**********
18	205	1842	1.99625	15268.7	173894	0.0878049	2.71737	15.4938	3.87028
Pooled Ratio		0.0878049	±	0.0219332
Mean Ratio		0.044691	±	0.0168817
Pooled Age		15.4938	±	3.87028	1 S.E.
Mean Crystal Age		7.89071	±	2.98179	1 S.E.
Central Age		15.4938	±	3.87028
Age Dispersion		3.09602e-09	%
Chi-squared		7.82663	with	29	degrees of freedom
P (Chi-Sq)		99.9	%
MSWD		0.269884
Sample Number		131013X
Position (#)		40
Area of Graticule Square		6.4e-07
No. of Crystals		13
Zeta Factor ± Error		368.1	14.9
Rho d (% Relative Error)		952100	1.81161
N d		3047
N s	N i	N g	Dpar	ρ s	ρ i	ρ s / ρ i	U ppm	Age (Ma)	Age error
0	2	100	-	0	31250	0	0.492333	0	0
0	2	100	-	0	31250	0	0.492333	0	0
0	1	40	-	0	39062.5	0	0.615416	0	0
0	2	50	-	0	62500	0	0.984665	0	0
0	1	100	-	0	15625	0	0.246166	0	0
0	1	100	-	0	15625	0	0.246166	0	0
1	6	100	1.94	15625	93750	0.166667	1.477	29.1397	31.501
2	7	70	2.03	44642.9	156250	0.285714	2.46166	49.8734	40.0488
0	1	100	-	0	15625	0	0.246166	0	0
0	3	100	-	0	46875	0	0.738499	0	0
1	3	70	1.9	22321.4	66964.3	0.333333	1.055	58.1483	67.1934
0	1	100	-	0	15625	0	0.246166	0	0
0	2	100	-	0	31250	0	0.492333	0	0
**********	**********	**********	**********	**********	**********	**********	**********	**********	**********
4	32	1130	1.95667	5530.97	44247.8	0.125	0.697108	21.8671	11.6373
Pooled Ratio		0.125	±	0.0665226
Mean Ratio		0.0604396	±	0.0333045
Pooled Age		21.8671	±	11.6373	1 S.E.
Mean Crystal Age		10.5824	±	5.83344	1 S.E.
Central Age		21.8671	±	11.6373
Age Dispersion		0.00029852	%
Chi-squared		3.97768	with	12	degrees of freedom
P (Chi-Sq)		98.3836	%
MSWD		0.331473

## Sheet: Length Data
Supplementary Table S4 (cont.): Full apatite fission track count and length data
Length (µm)	Angle to c-axis	Dpar (µm)
15.39	45	2.51	Sample No.	151013A
14.1	76	2.49	Mean	14.0754	±	0.329389
15.06	49	2.3	SD	1.57969
16.24	61	2.4	Skew	-0.94314
15.17	78	2.23	n	24
12.13	65	1.94
16.21	17	1.8
15.42	2	1.97
14.43	71	2.09
13.45	89	2.41
13.28	70	2.02
14.71	58	2.09
14.54	84	2.34
13.58	16	1.83
14.72	65	2.47
15.6	80	2.47
11.97	42	2.38
11.82	61	2.83
12.52	73	2.23
14.58	80	2.27
13.21	83	2.26
15.62	16	2.16
9.77	86	1.92
14.29	78	1.92
16.53	7	2.11	Sample No.	151013C
14.17	32	2.15	Mean	14.4004	±	0.253229
13.28	74	2.2	SD	1.24056
14.5	19	2.57	Skew	-0.0553589
13.35	76	2.47	n	25
15.53	28	2.47
12.52	68	2.47
16.62	76	2.18
15.07	24	1.96
14.03	82	2.34
14.42	42	2.34
15.62	31	2.34
15.94	66	1.65
13.88	45	2.44
13.96	61	2.19
13.95	74	1.91
14.84	58	2.29
14.76	70	2.29
13.81	86	2.09
13.3	73	1.93
11.55	59	1.93
16.16	37	2.22
13.93	51	2.03
13.23	81	2.08
15.06	41	2.08
12.96	69	2.62	Sample No.	151013I
13.45	65	2.36	Mean	14.65	±	0.477587
15.9	88	2.36	SD	1.26358
15.06	82	2.44	Skew	0.146926
16.51	47	2.26	n	8
15.44	27	2.44
14.11	42	2.44
13.77	42	2.44
16.32	85	2.42	Sample No.	151013J
16.39	29	2.43	Mean	14.2741	±	0.15602
14.27	69	1.99	SD	0.896265
13.78	87	1.98	Skew	0.755955
13.16	78	1.98	n	34
14.77	38	2.29
14.17	88	2.36
14.03	86	2.36
13.29	53	2.31
13.27	74	2.31
13.58	48	2.23
14.17	83	2.22
13.44	84	2.22
13.66	63	2.22
13.19	62	2.22
14.64	58	2.22
15.62	52	2.22
13.94	83	2.21
13.43	69	2.33
14.27	84	2.08
13.85	42	2.54
14.72	88	2.54
12.67	52	2.54
14.9	80	2.54
14.54	86	1.7
15.83	56	2.66
13.89	75	2.16
14.12	86	2.44
14.61	44	2.35
14.2	82	2.35
15.7	56	2.35
14.33	36	2.03
14.73	26	2.03
13.84	54	2.03
14.8	85	1.47	Sample No.	191014D
13.59	90	1.72	Mean	13.786	±	0.387921
12.65	80	1.7	SD	0.775841
13.94	41	1.7	Skew	-0.377299
13.95	67	1.72	n	5

## Sheet: G51211
Whitney, D.L., et al., 2023, Breaking plates: Creation of the East Anatolian fault, the Anatolian plate, and a tectonic escape system: Geology, https://doi.org/10.1130/G51211.1
