# Supplementary material
Source: publisher figshare collection journal article supplement (https://gsapubs.figshare.com/articles/dataset/_/22756583)

**Figure S9**

(A) Near-Euphrates Traverse Age vs Elevation Plot (samples 131013A–X)

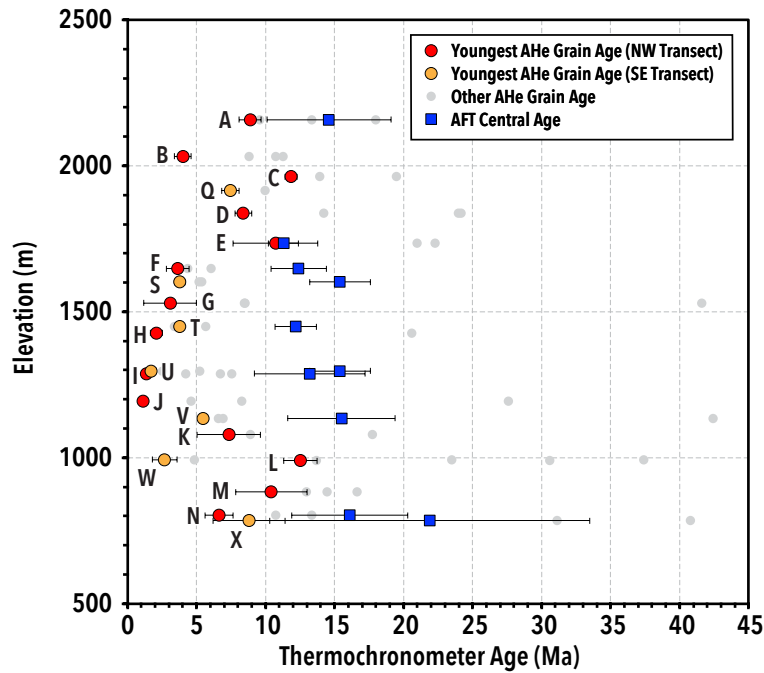

(B) Near-Euphrates Traverse (samples 131013A–X) Single Grain AHe Ages ( $n = 71$ )

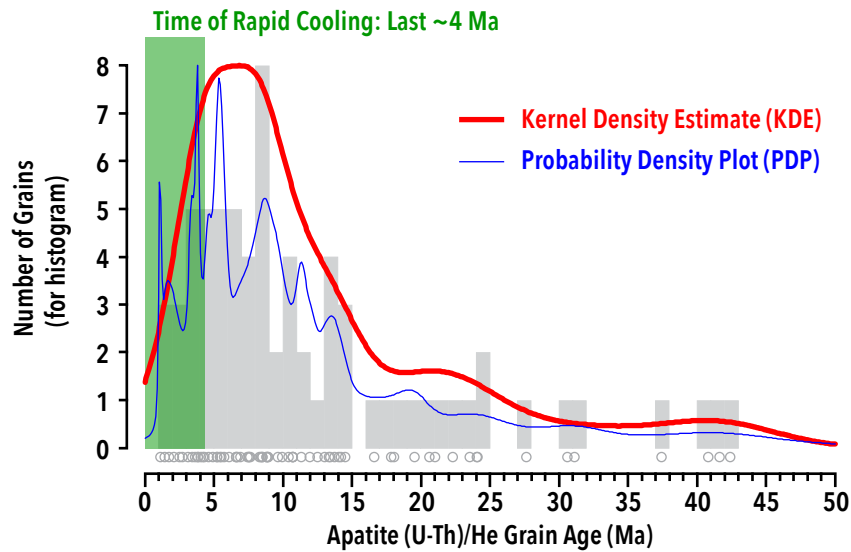

(C) Central Transantarctic Mountains Vertical Sample Transect Single Grain AHe Ages ( $n = 130$ ) (data from He et al., 2021)

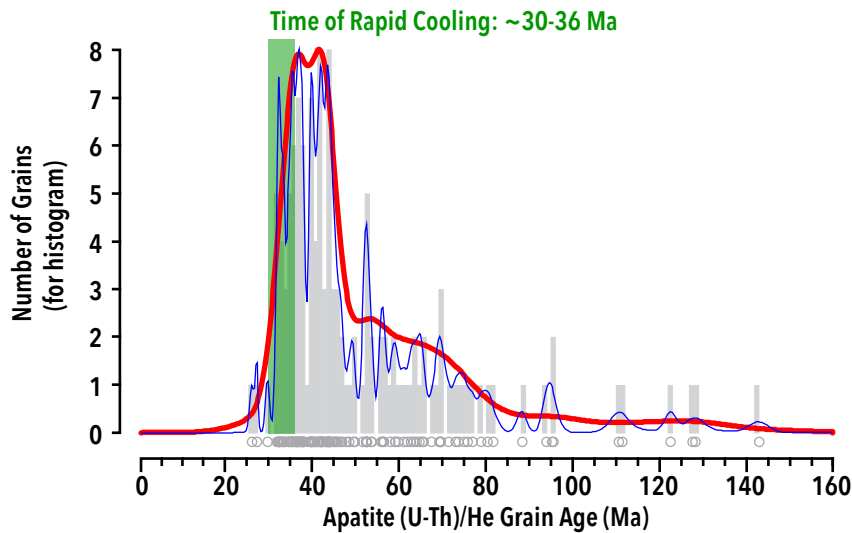

Supplement: Supplementary file 4 [file 1]
