# Supplementary material
Source: publisher figshare collection journal article supplement (https://gsapubs.figshare.com/articles/dataset/_/22756583)

**Figure S8: Graphical QTQt modeling results for the Mount Berit traverse samples 151013 A, C, I, J, & 171013A**

**(A) Max Mode Model Results**

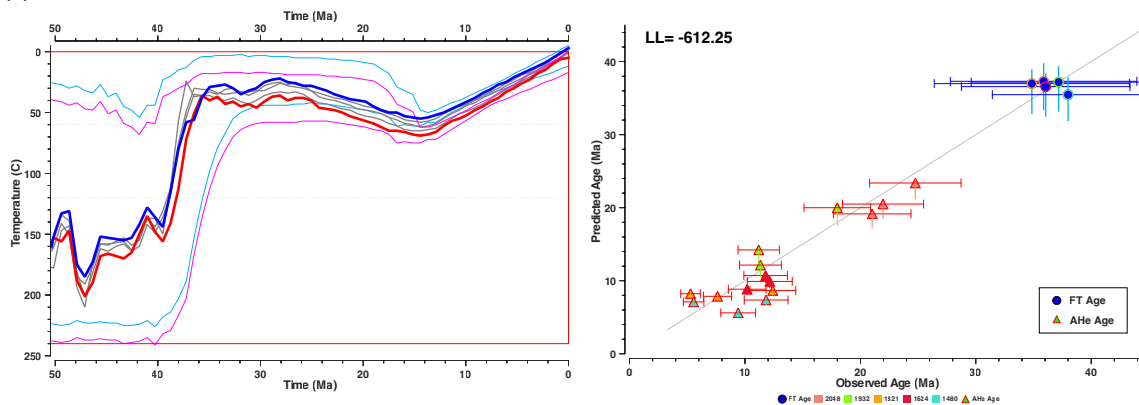

**(B) Expected Model Results**

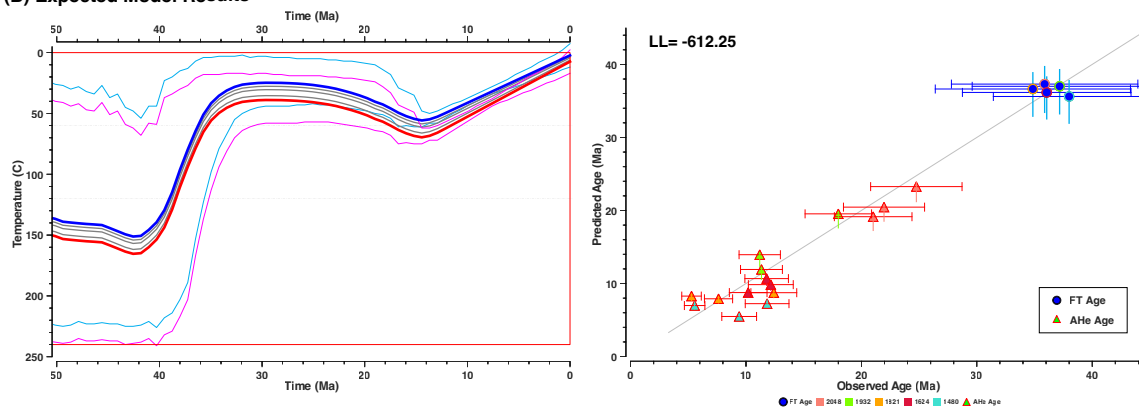

**(C) Highest Elevation Sample Relative Probability (151013A)**

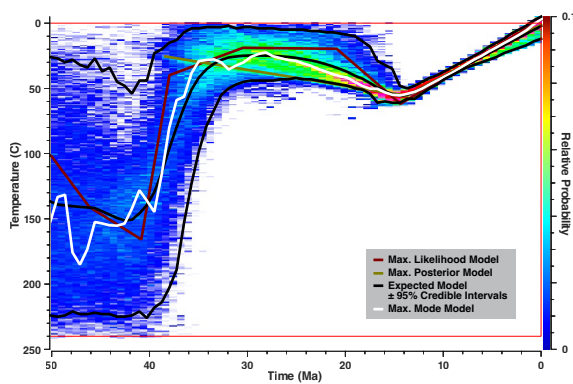

**(D) Lowest Elevation Sample Relative Probability (151013J)**

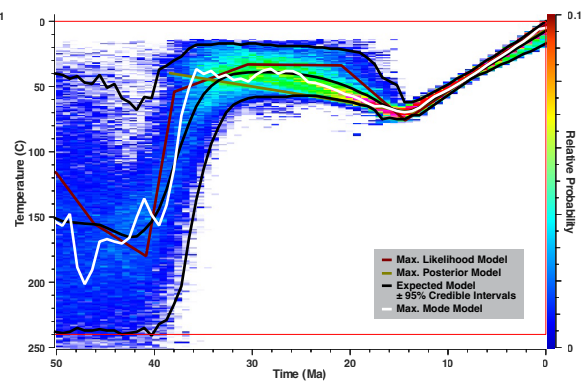

Supplement: Supplementary file 6 [file 1]
