# Supplementary material
Source: publisher figshare collection journal article supplement (https://gsapubs.figshare.com/articles/dataset/_/22756583)

**Figure S6: Graphical QTQt modeling results for the near-Euphrates traverse samples 131013 A, E, F, I (NW of the EAFZ) and 131013 S, T, U, V (SE of the EAFZ)**

**(A) Max Mode Model Results**

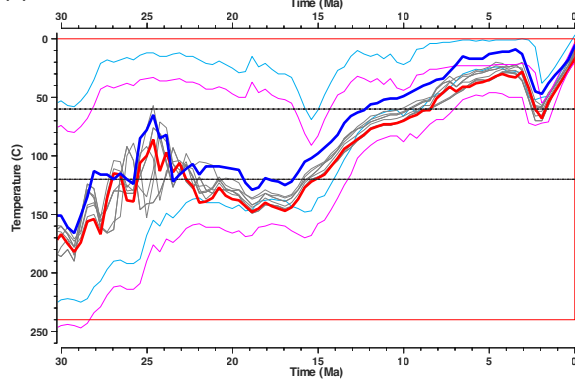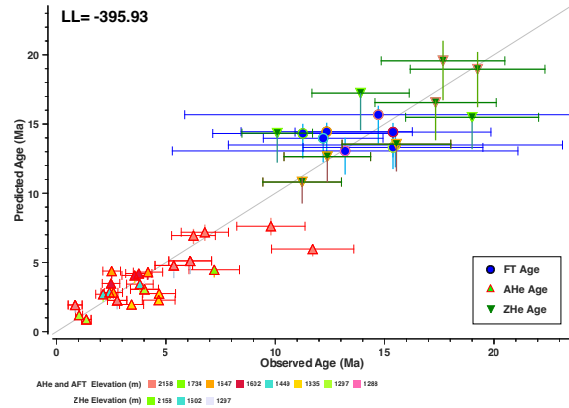

**(B) Expected Model Results**

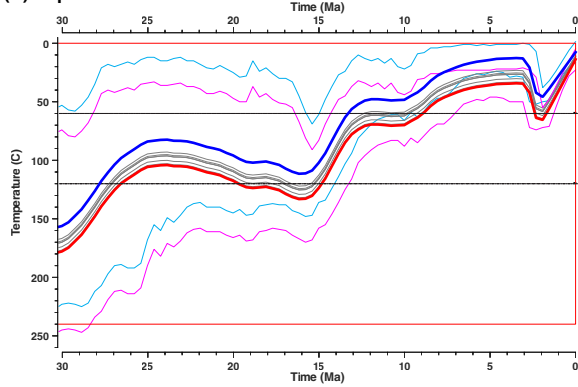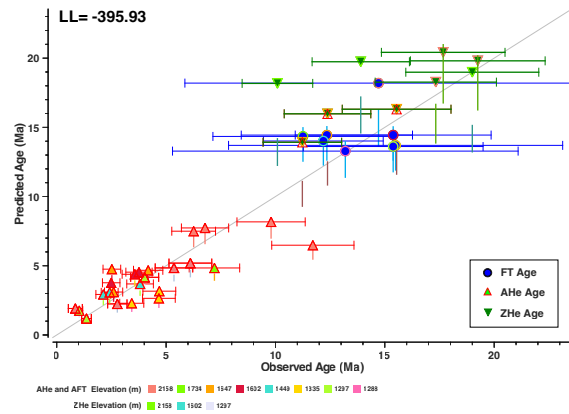

**(C) Highest Elevation Sample Relative Probability (131013A)**

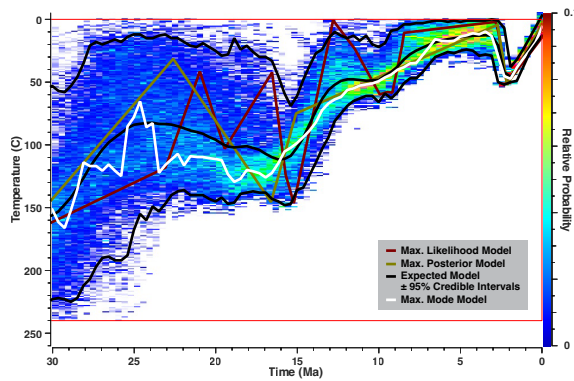

**(D) Lowest Elevation Sample Relative Probability (131013V)**

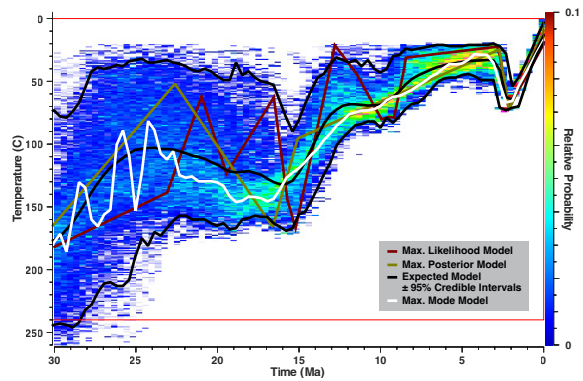

Supplement: Supplementary file 7 [file 1]
