# Supplementary material
Source: publisher figshare collection journal article supplement (https://gsapubs.figshare.com/articles/dataset/_/22756583)

**Figure S7: Graphical QTQt modeling results for the southern Pütürge massif samples 191014C, D, E**

**(A) Max Mode Model Results**

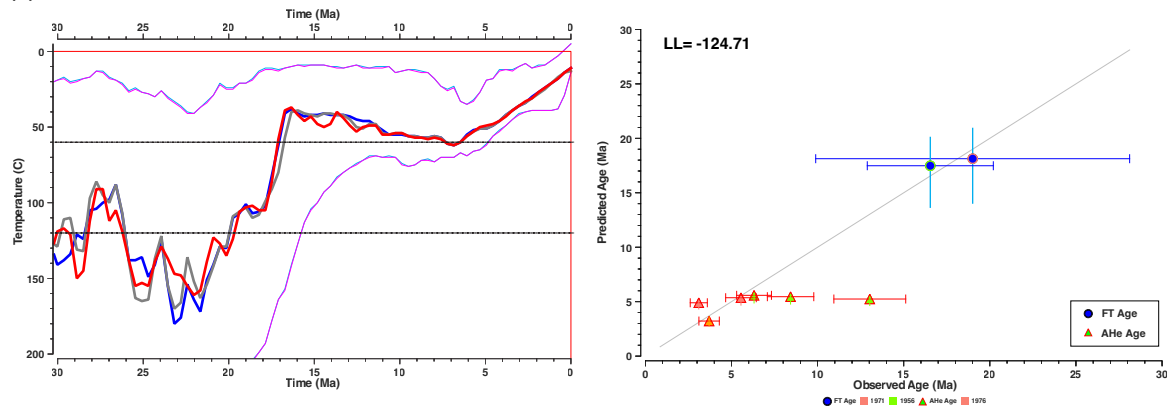

**(B) Expected Model Results**

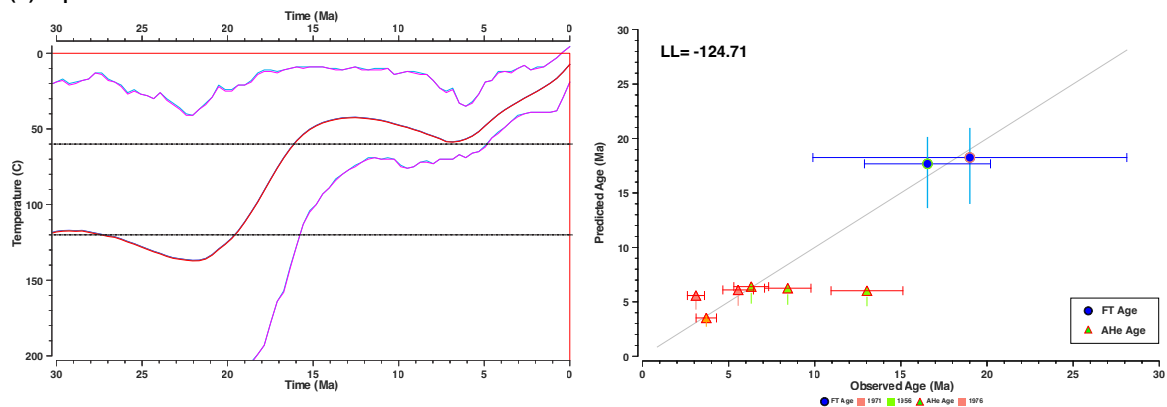

**(C) Highest Elevation Sample Relative Probability (191014E)**

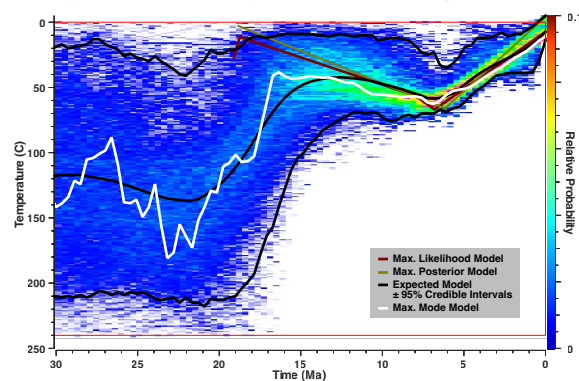

**(D) Lowest Elevation Sample Relative Probability (191014D)**

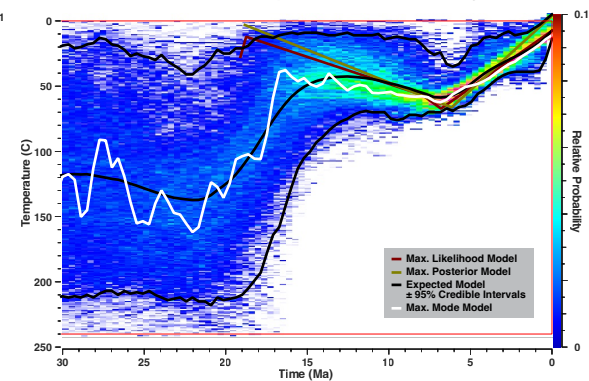

Supplement: Supplementary file 8 [file 1]
