# Supplementary material
Source: publisher figshare collection journal article supplement (https://gsapubs.figshare.com/articles/dataset/_/22756583)

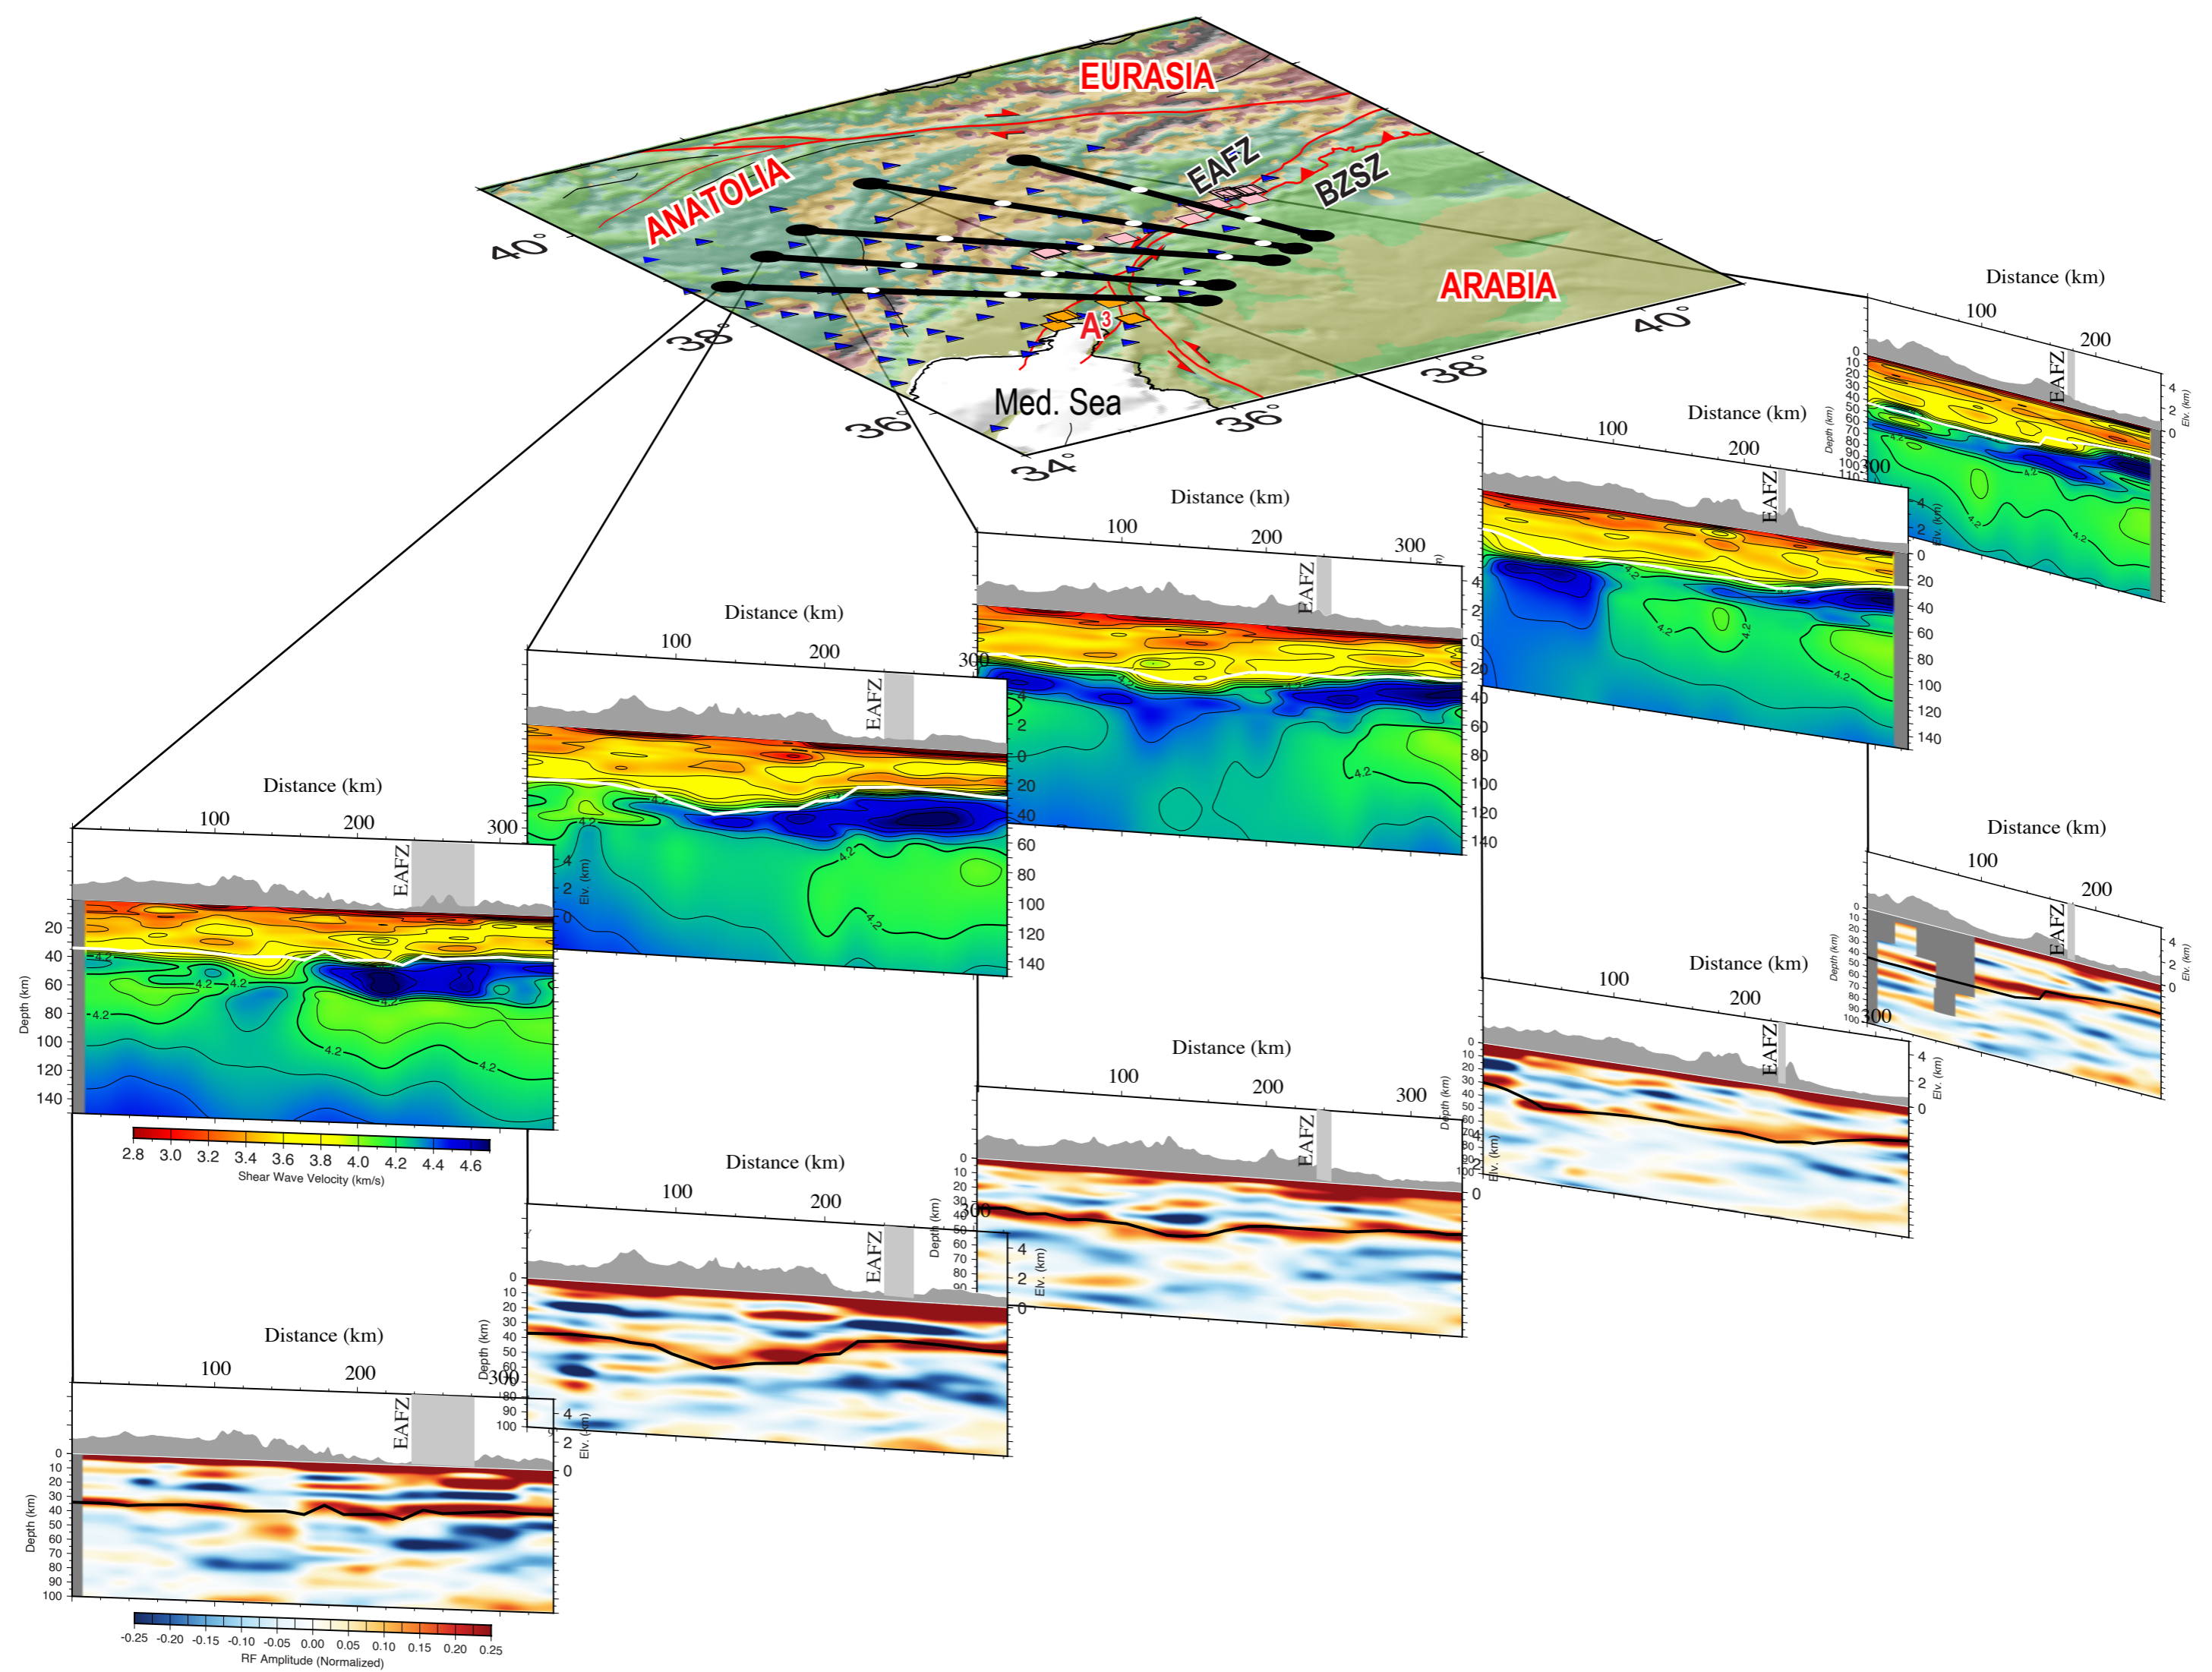

Figure S10

Supplement: Supplementary file 5 [file 1]
